# Supplementary material for: Integrating metabolite and transcriptome analysis revealed the different mechanisms of characteristic compound biosynthesis and transcriptional regulation in tea flowers
Source: PubMed Central journal article supplement (PMC9557745; doi:10.3389/fpls.2022.1016692), 2022-09-29
Supplement: DataSheet_1.pdf [file DataSheet_1.pdf]

Figure S1

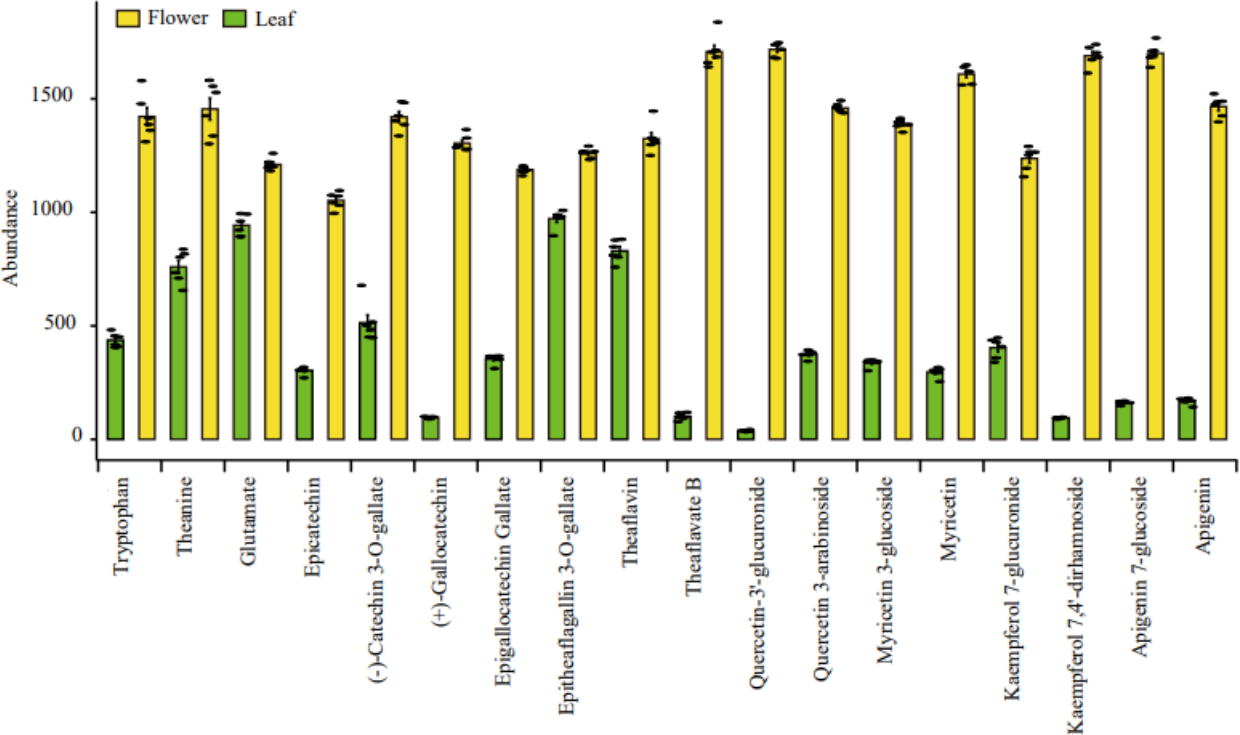

Figure S1. Differences in key metabolites between tea flowers and leaves.

**Figure S2**

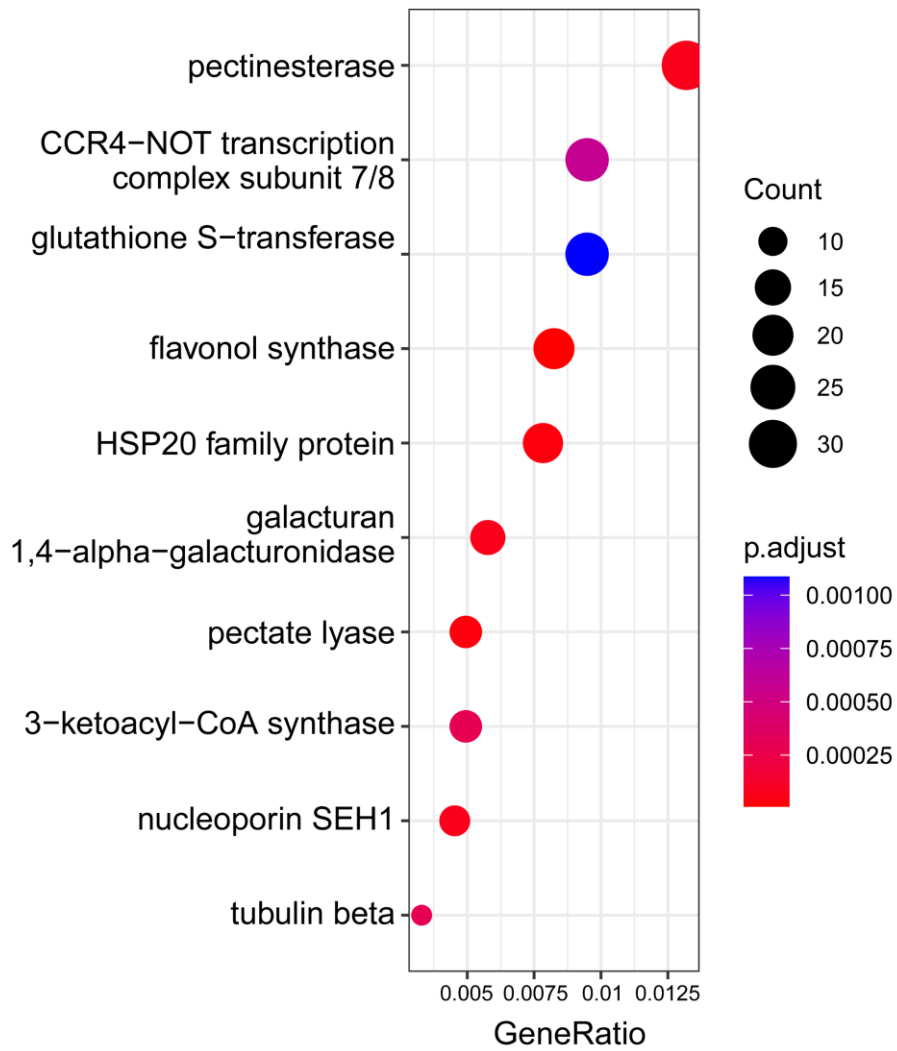

**Figure S2. KEGG pathway analysis of different expression genes in developing tea flowers.**

**Figure S3**

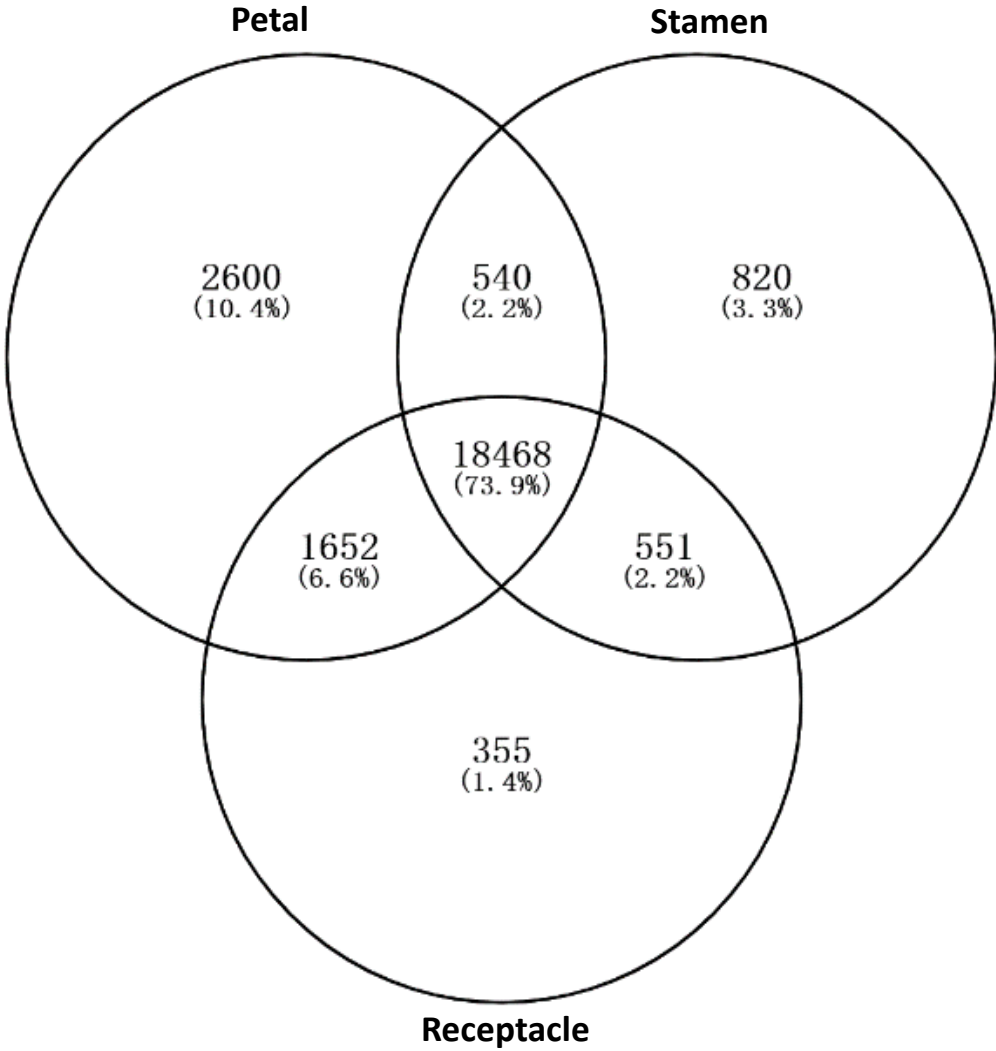

**Figure S3. Venn showing the number of expression genes in petal, stamen and receptacle.**

**Figure S4**

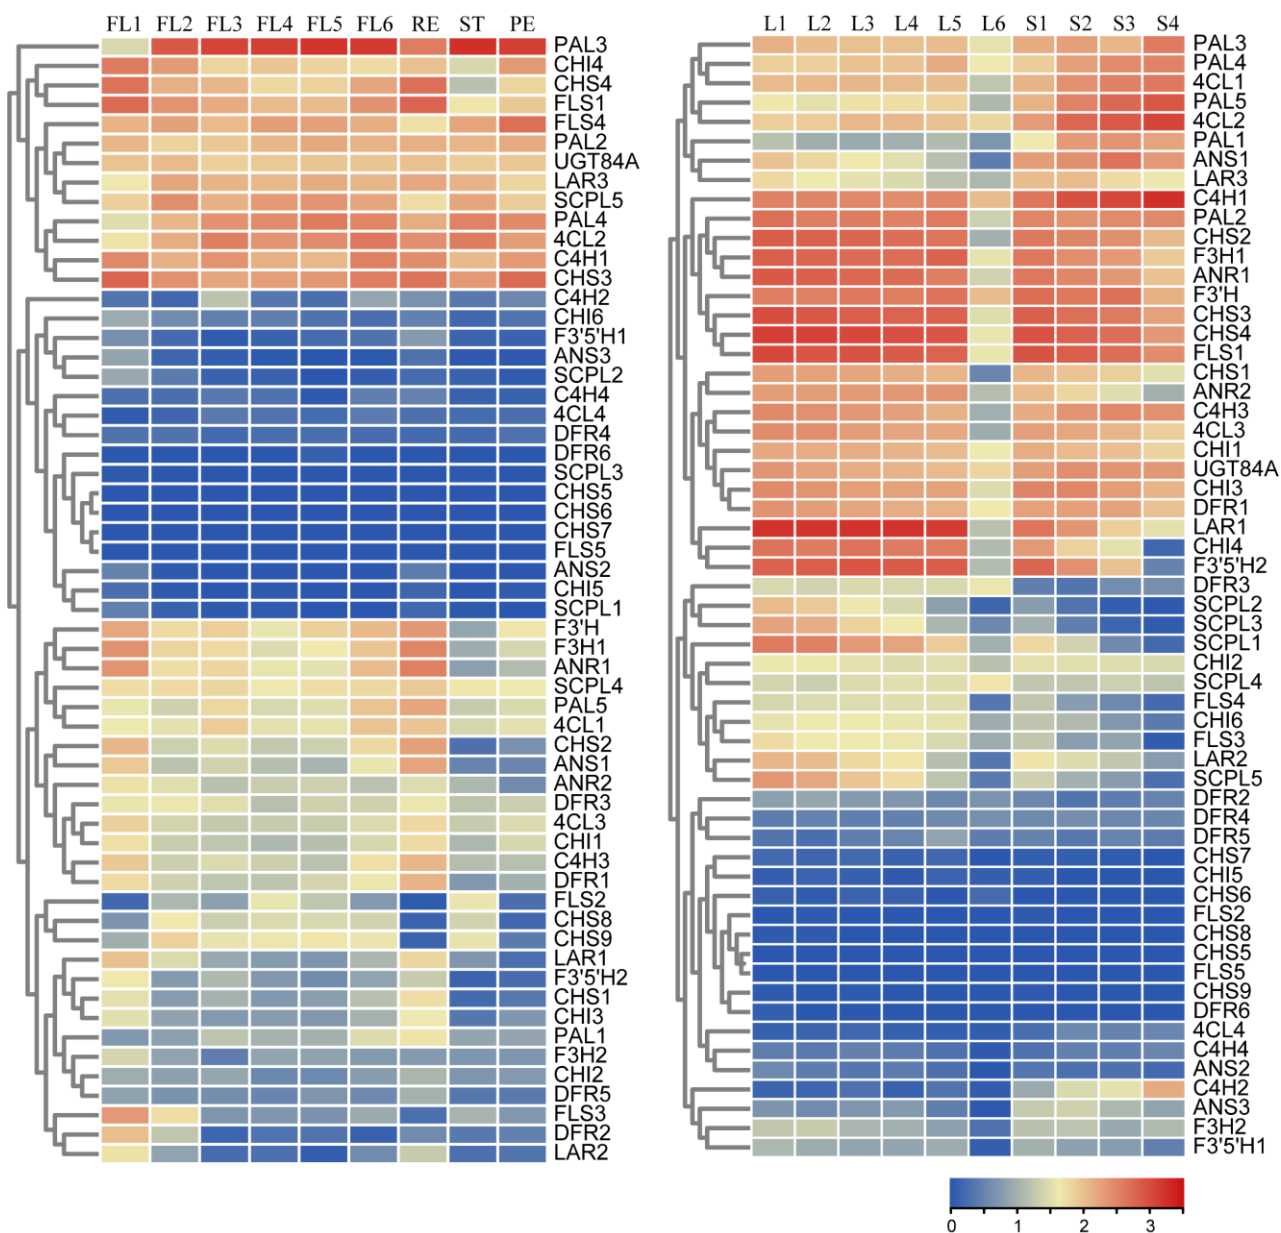

**Figure S4. Heat map expression analysis of genes involved in flavonoid biosynthesis in tea flowers and leaves.** The expression level ( $\log_{10}(\text{FPKM})$ ) of each gene is shown in the heatmap boxes.

**Figure S5**

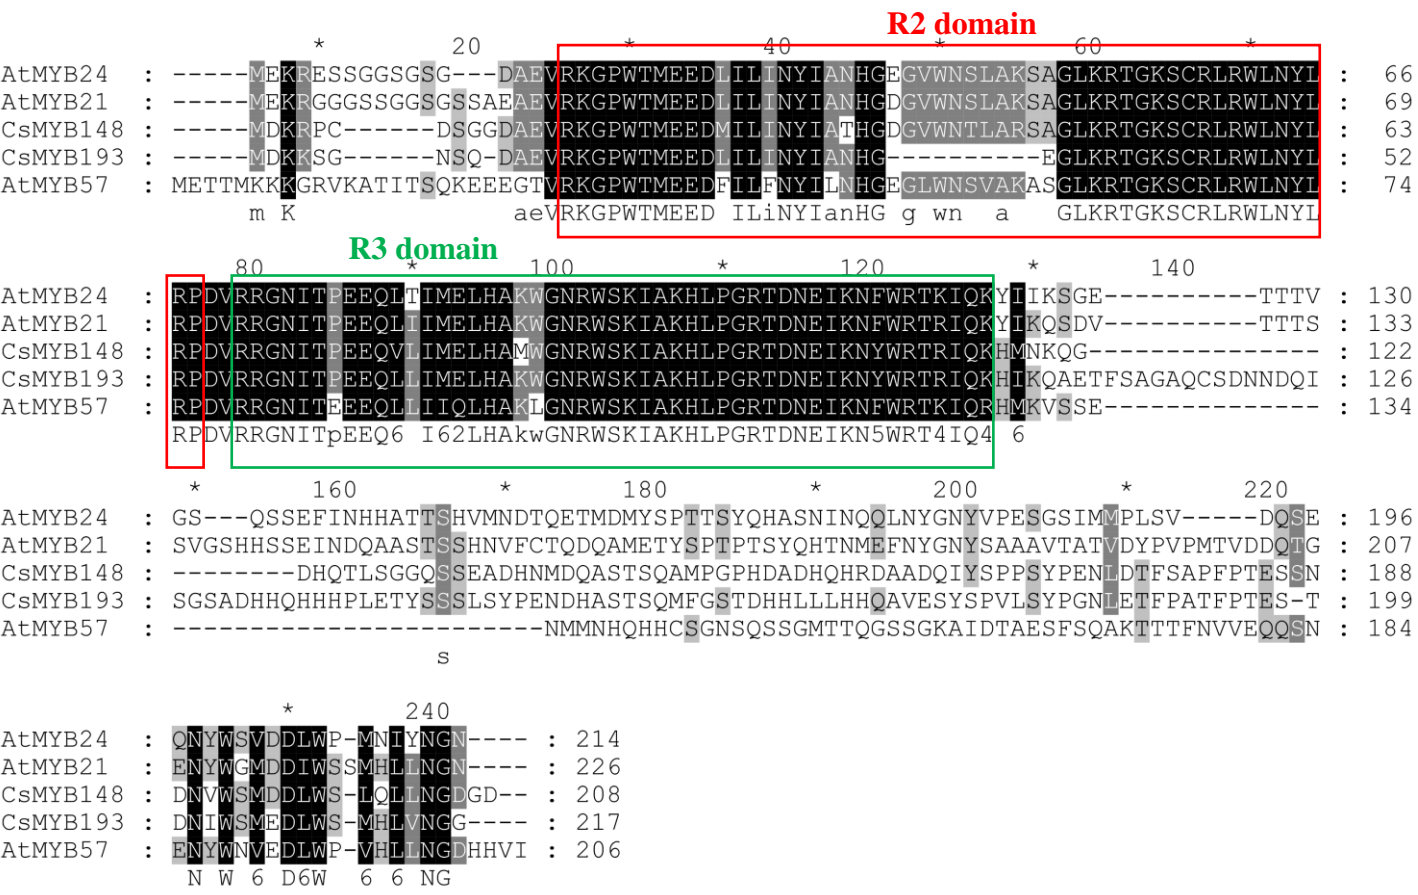

**Figure S5. Alignment of tea MYB148 and MYB193 and related MYBs involved in regulating the flavonol biosynthesis in flowers. The R2R3 domain of those MYB proteins were remarked by rectangles.**

Figure S6

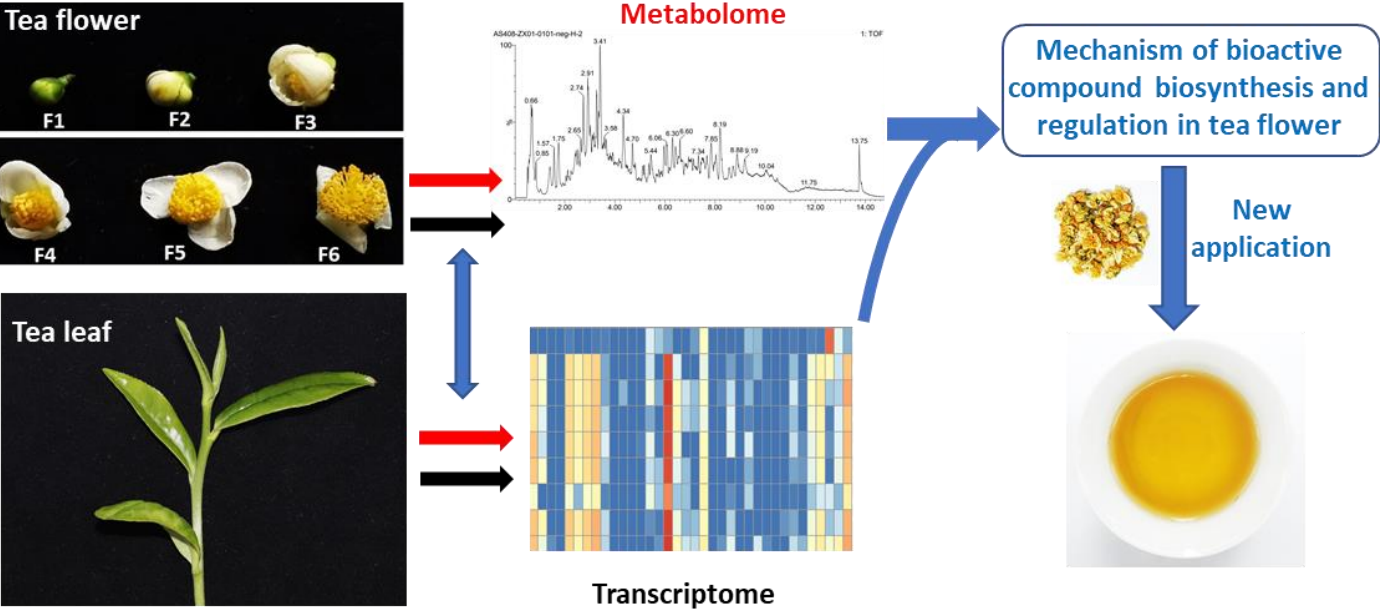

Figure S6. A summary of this study on tea flowers.
